# Supplementary material
Source: publisher figshare collection journal article supplement (https://rs.figshare.com/ndownloader/files/8934205)

# Electronic Supplementary Material for

Male relatedness and familiarity are required to modulate male-induced harm to females in *Drosophila*, 2017, *Proceedings of the Royal Society B*

Sally Le Page<sup>1</sup>, Irem Sepil<sup>1</sup>, Ewan Flinham<sup>1</sup>, Tommaso Pizzari<sup>1</sup>, Pau Carazo<sup>2</sup> and Stuart Wigby<sup>1</sup>

---

<sup>1</sup> Edward Grey Institute, Department of Zoology, University of Oxford, UK.

<sup>2</sup> Behaviour, Ecology and Evolution group, Instituto Cavanilles of Biodiversity and Evolutionary Biology, University of Valencia, Spain.

### Supplementary Table 1

**Summary of results from previous studies.** The findings from the five previous studies on this topic and the findings from this study on male-male fighting rate, female lifetime reproductive success and female reproductive lifespan. NA means that trait was not observed. The three IV populations, whilst nominally the same, have been reared apart over several decades. The Dahomey populations are all the same population.

| <i>Study</i>                       | <i>Fly population</i> | <i>Fighting rate</i>                                            | <i>Lifetime reproductive success</i>                                                               | <i>Reproductive lifespan</i>                                     |
|------------------------------------|-----------------------|-----------------------------------------------------------------|----------------------------------------------------------------------------------------------------|------------------------------------------------------------------|
| <i>Carazo et al 2014 [22]</i>      | Dahomey               | Lower in related familiar males than unrelated unfamiliar males | Higher in related familiar males than unrelated unfamiliar males                                   | Longer in related familiar males than unrelated unfamiliar males |
| <i>Hollis et al 2015 [24]</i>      | IV (a)                | NA                                                              | Higher in related familiar males than both related unfamiliar males and unrelated unfamiliar males | No effect                                                        |
| <i>Carazo et al 2015 [23]</i>      | Dahomey               | Lower in related familiar males than unrelated unfamiliar males | NA                                                                                                 | NA                                                               |
| <i>Chippindale et al 2015 [25]</i> | IV (b)                | NA                                                              | No effect between related familiar males and unrelated unfamiliar males                            | No effect                                                        |
| <i>Martin et al 2015 [26]</i>      | IV (c)                | Lower in related familiar males than unrelated unfamiliar males | No effect between related familiar males and unrelated unfamiliar males                            | No effect                                                        |
| <i>Le Page et al (this study)</i>  | Dahomey               | No effect                                                       | Higher in related familiar males than unrelated familiar males                                     | Longer in related familiar males than unrelated familiar males   |

## Supplementary Table 2

**Summary of block main effects and interactions including block.** The experiment occurred over two blocks. When testing each measure of female harm and male behaviour, we included block and all possible interactions of block with the other main effects as a fixed effects. None of these interactions were significant ( $P < 0.05$ ) so were removed from the final model, and block was retained as a main effect. The values below for the interactions are from the full models including interactions, and the values for block as a main effect are from the final models excluding interactions.

| <b>Model</b>                                | <b>Effect</b>                     | <b>Result</b>                  |
|---------------------------------------------|-----------------------------------|--------------------------------|
| <b><i>Lifetime reproductive success</i></b> | Relatedness*Block                 | $t_{353} = 0.54$ , $P = 0.59$  |
|                                             | Familiarity*Block                 | $t_{353} = 1.01$ , $P = 0.28$  |
|                                             | Relatedness*Familiarity*Block     | $t_{353} = -0.67$ , $P = 0.51$ |
|                                             | Block                             | $t_{353} = 4.37$ , $P < 0.01$  |
| <b><i>Reproductive Ageing</i></b>           | Relatedness*Block                 | $t_{355} = -0.89$ , $P = 0.38$ |
|                                             | Familiarity*Block                 | $t_{355} = -0.59$ , $P = 0.56$ |
|                                             | Relatedness*Familiarity*Block     | $t_{355} = 0.83$ , $P = 0.41$  |
|                                             | Relatedness*Day*Block             | $t_{891} = 1.61$ , $P = 0.11$  |
|                                             | Familiarity*Day*Block             | $t_{891} = 1.53$ , $P = 0.13$  |
|                                             | Relatedness*Familiarity*Day*Block | $t_{891} = -1.29$ , $P = 0.20$ |
|                                             | Block                             | $t_{358} = 4.08$ , $P < 0.01$  |
| <b><i>Female lifespan</i></b>               | Relatedness*Block                 | $\chi^2_1 = 0.70$ , $P = 0.40$ |
|                                             | Familiarity*Block                 | $\chi^2_1 = 0.10$ , $P = 0.76$ |
|                                             | Relatedness*Familiarity*Block     | $\chi^2_1 = 0.05$ , $P = 0.83$ |
|                                             | Block                             | $\chi^2_1 = 8.88$ , $P < 0.01$ |
| <b><i>Female reproductive lifespan</i></b>  | Relatedness*Block                 | $\chi^2_1 = 1.02$ , $P = 0.31$ |
|                                             | Familiarity*Block                 | $\chi^2_1 = 0.07$ , $P = 0.79$ |
|                                             | Relatedness*Familiarity*Block     | $\chi^2_1 = 0.39$ , $P = 0.53$ |
|                                             | Block                             | $\chi^2_1 = 0.55$ , $P = 0.46$ |
| <b><i>Male courtship</i></b>                | Relatedness*Block                 | $t_{349} = 0.21$ , $P = 0.84$  |
|                                             | Familiarity*Block                 | $t_{349} = -0.31$ , $P = 0.76$ |
|                                             | Relatedness*Familiarity*Block     | $t_{349} = -0.14$ , $P = 0.89$ |
|                                             | Block                             | $t_{352} = 2.02$ , $P = 0.04$  |
| <b><i>Male aggression</i></b>               | Relatedness*Block                 | $t_{349} = 1.66$ , $P = 0.10$  |
|                                             | Familiarity*Block                 | $t_{349} = 0.75$ , $P = 0.45$  |
|                                             | Relatedness*Familiarity*Block     | $t_{349} = -1.43$ , $P = 0.15$ |
|                                             | Block                             | $t_{352} = 4.71$ , $P < 0.01$  |
| <b><i>Mating</i></b>                        | Relatedness*Block                 | $t_{349} = 0.04$ , $P = 0.97$  |
|                                             | Familiarity*Block                 | $t_{349} = -0.77$ , $P = 0.44$ |
|                                             | Relatedness*Familiarity*Block     | $t_{349} = 0.77$ , $P = 0.44$  |
|                                             | Block                             | $t_{352} = -3.16$ , $P < 0.01$ |

### Supplementary Table 3

**Summary statistics of the frequency of behavioural observations.** Aggression and courtship behaviours were measured as the number of scans per day in which we observed any males performing that behaviour in each vial. Numbers shown are the mean proportion of scans in which that behaviour was shown  $\pm$  standard error. Mating was measured as whether a mating was observed that day in each vial, with 1 representing mating observed, and 0 representing no mating observed. Numbers shown are the means of these binary values  $\pm$  standard error.

| Male treatment       | Aggression          | Courtship          | Mating                    |
|----------------------|---------------------|--------------------|---------------------------|
| Related familiar     | 0.197 $\pm$ 0.00788 | 0.497 $\pm$ 0.0133 | 0.0942 $\pm$ 0.0122       |
| Related unfamiliar   | 0.204 $\pm$ 0.00854 | 0.489 $\pm$ 0.0148 | 0.0764 $\pm$ 0.0123       |
| Unrelated familiar   | 0.201 $\pm$ 0.00746 | 0.534 $\pm$ 0.0139 | 0.0866 $\pm$ 0.0125       |
| Unrelated unfamiliar | 0.189 $\pm$ 0.00759 | 0.529 $\pm$ 0.0134 | 0.0900 $\pm$ 0.01270.0127 |

#### Supplementary Table 4

**Summary of statistical results from binomial penalised quasi-likelihood GLMM of the frequency of behavioural observations.** Aggression and courtship behaviours were measured as the number of scans per day in which we observed any males performing that behaviour in each vial. Mating was measured as whether a mating was observed that day in each vial.

| <i>Behaviour</i>  | <i>Factor</i>           | <i>t</i> | <i>Degrees of freedom</i> | <i>P</i> |
|-------------------|-------------------------|----------|---------------------------|----------|
| <i>Aggression</i> | Relatedness             | 0.01     | 352                       | 0.99     |
|                   | Familiarity             | 0.75     | 352                       | 0.45     |
|                   | Relatedness*Familiarity | -0.99    | 352                       | 0.32     |
| <i>Courtship</i>  | Relatedness             | 1.26     | 352                       | 0.21     |
|                   | Familiarity             | -0.35    | 352                       | 0.73     |
|                   | Relatedness*Familiarity | 0.45     | 352                       | 0.65     |
| <i>Mating</i>     | Relatedness             | -0.01    | 352                       | 0.99     |
|                   | Familiarity             | -0.78    | 352                       | 0.43     |
|                   | Relatedness*Familiarity | 0.41     | 352                       | 0.69     |

### Supplementary Table 5

**Risk ratios for female reproductive lifespan and lifespan.** Reproductive lifespan was measured as the last day of the last time period in which the female reproduced. Numbers shown are the risk ratios between male treatments across both blocks with lower and upper 95% intervals in parentheses.

| <i>Ratio</i>                                   | <i>Reproductive Lifespan</i> | <i>P</i> | <i>Lifespan</i>      | <i>P</i> |
|------------------------------------------------|------------------------------|----------|----------------------|----------|
| <i>Related familiar/Related unfamiliar</i>     | 0.757 (0.555,1.033)          | 0.0789   | 0.750 (0.550, 1.022) | 0.0680   |
| <i>Related familiar/Unrelated familiar</i>     | 0.730 (0.539, 0.988)         | 0.0414   | 0.755 (0.558, 1.022) | 0.0687   |
| <i>Related familiar/Unrelated unfamiliar</i>   | 0.912 (0.667, 1.248)         | 0.563    | 0.868 (0.637, 1.184) | 0.372    |
| <i>Related unfamiliar/Unrelated familiar</i>   | 0.964 (0.713, 1.301)         | 0.812    | 1.007 (0.745, 1.361) | 0.962    |
| <i>Related unfamiliar/Unrelated unfamiliar</i> | 1.204 (0.881, 1.647)         | 0.244    | 1.158 (0.851, 1.576) | 0.350    |
| <i>Unrelated familiar/Unrelated unfamiliar</i> | 1.249 (0.921, 1.697)         | 0.153    | 1.150 (0.850, 1.556) | 0.365    |

### Supplementary Figure 1

**The effect of male relatedness and larval familiarity on female reproduction over time.** Points show the average number of offspring that reached adult and P13 pupal stage laid each day by each female during the experimental period from the first experimental block (dark points), the second experimental block (light points) and mean daily offspring production for each male treatment across both blocks (crosses, also shown in Supplementary Figure 2). Females mated to triplets of males that were related aged significantly slower than those mated to triplets of unrelated males ( $P < 0.05$ ). There was no difference in reproductive ageing between females mated to triplets of familiar and unfamiliar males ( $P > 0.05$ )

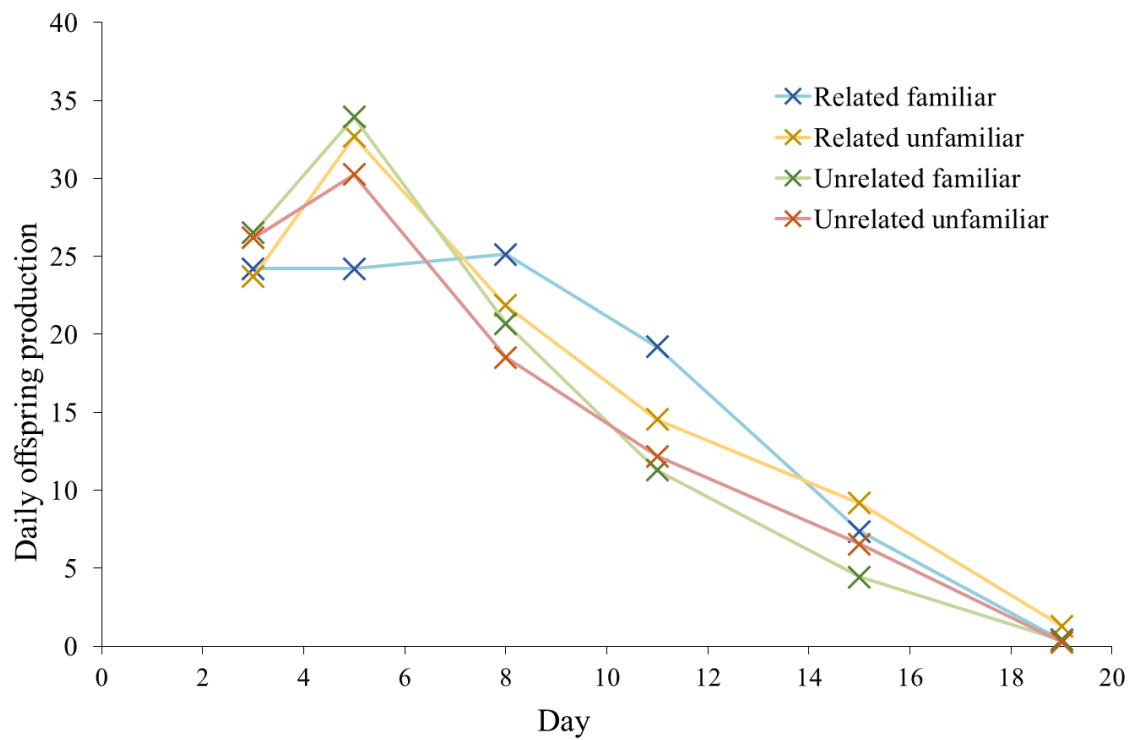

## Supplementary Figure 2

**The effect of male relatedness and larval familiarity on female reproduction over time.** The mean number of offspring that reached adult and P13 pupal stage laid each day by each female during the experimental period for each male treatment across both blocks. Standard error bars are not shown as the means are an average of two experimental blocks, and the distributions for each treatment and block can be found in the supplementary material. The more negative the gradient of the curve, the faster the reproductive ageing. Females mated to triplets of males that were related aged significantly slower than those mated to triplets of unrelated males ( $P < 0.05$ ). There was no difference in reproductive ageing between females mated to triplets of familiar and unfamiliar males ( $P > 0.05$ )

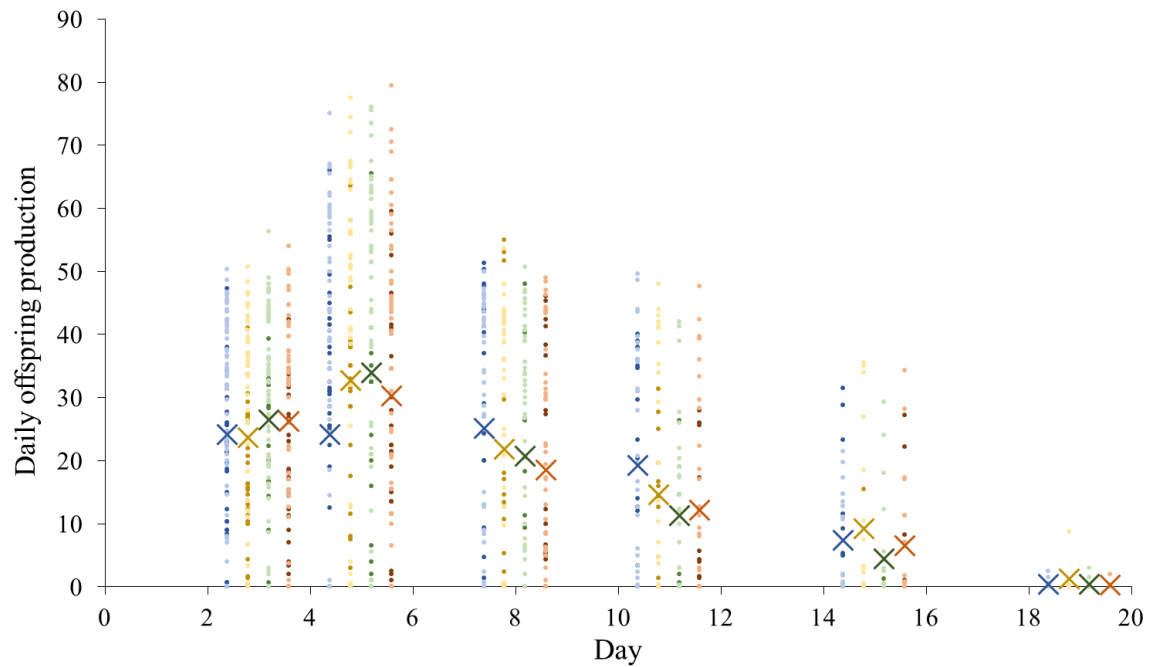

Supplement: Supplementary file [file 8934205]
